# Supplementary material
Source: PubMed Central journal article supplement (PMC2993558)
Supplement: supp_110.174144_JPET174144SupplementaryData.pdf [file supp_110.174144_JPET174144SupplementaryData.pdf]

## Supplementary Data for JPET#174144

### A novel family of negative and positive allosteric modulators of NMDA receptors

Blaise Mathias Costa, Mark W. Irvine, Guangyu Fang, Richard J. Eaves, Marie Belen Mayo-Martin, Donald A. Skifter, David E. Jane, and Daniel T. Monaghan

Journal of Pharmacology and Experimental Therapeutics

**Figure 1.** NSC339614 selectively potentiates GluN1/GluN2C and GluN1/GluN2D receptors.

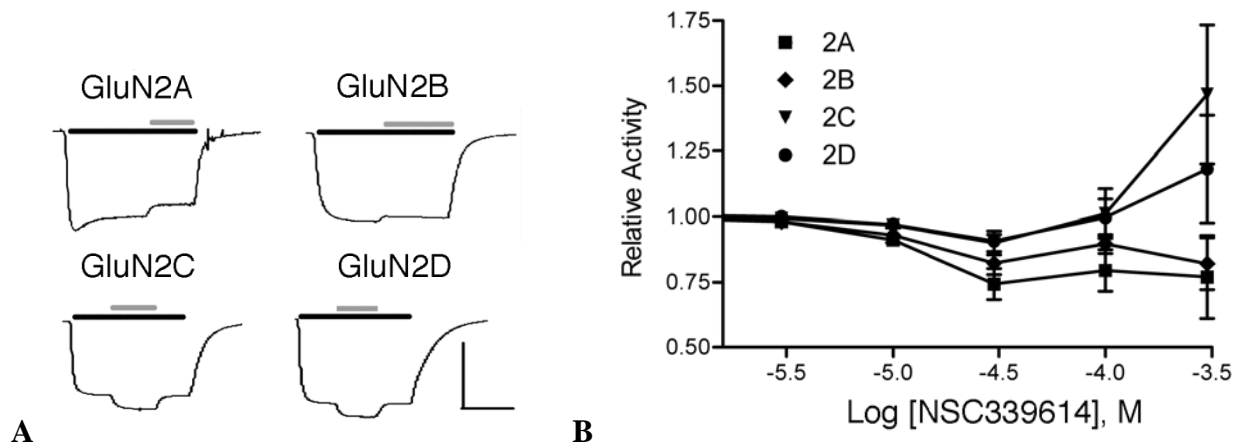

**A.** Agonist (10 μM L-glutamate plus 10 μM glycine; black bar) was added to *Xenopus* oocytes voltage-clamped at -60 mV expressing GluN1 + GluN2 (as indicated) to evoke a response. NSC339614 (100 μM) was then added as indicated by the gray bar. Scale bar values below. **B.** NSC339614 dose response for modulating agonist activation of GluN1/GluN2A (2A), GluN1/GluN2B (2B), GluN1/GluN2C (2C) and GluN1/GluN2D (2D) receptors. Values represent mean ± s.e.m. NSC339614 potentiated responses at both GluN1/GluN2C and GluN1/GluN2D receptors and had weak inhibitory activity at other NMDA receptors. The potentiating activity of NSC339614 did not saturate at 100 μM; greater potentiation was observed at the highest dose tested, 300 μM. However, the inhibitory activity

was the same at 30  $\mu\text{M}$  and 300  $\mu\text{M}$  for GluN2A and GluN2B-containing receptors, suggesting that occupation at this site by NSC339614 does not fully inhibit receptor function – or that it is offset by a potentiating activity. In two of 15 cells tested, NSC339614 caused a weak inhibition of GluN1/GluN2C and GluN1/GluN2D receptor responses at 100  $\mu\text{M}$  and 300  $\mu\text{M}$  concentrations instead of potentiation. Thus, the ability of NSC339614 to potentiate GluN1/GluN2C and GluN1/GluN2D receptor responses may be state-dependent and not an intrinsic property of the receptor complex.

Scale bar values in A:

|     | GluN1/GluN2A | GluN1/GluN2B | GluN1/GluN2C | GluN1/GluN2D |
|-----|--------------|--------------|--------------|--------------|
| nA  | 80           | 500          | 800          | 1600         |
| sec | 5            | 5            | 6            | 9            |

**Figure 2.** NSC339614 is a mixture of 4 isomers.

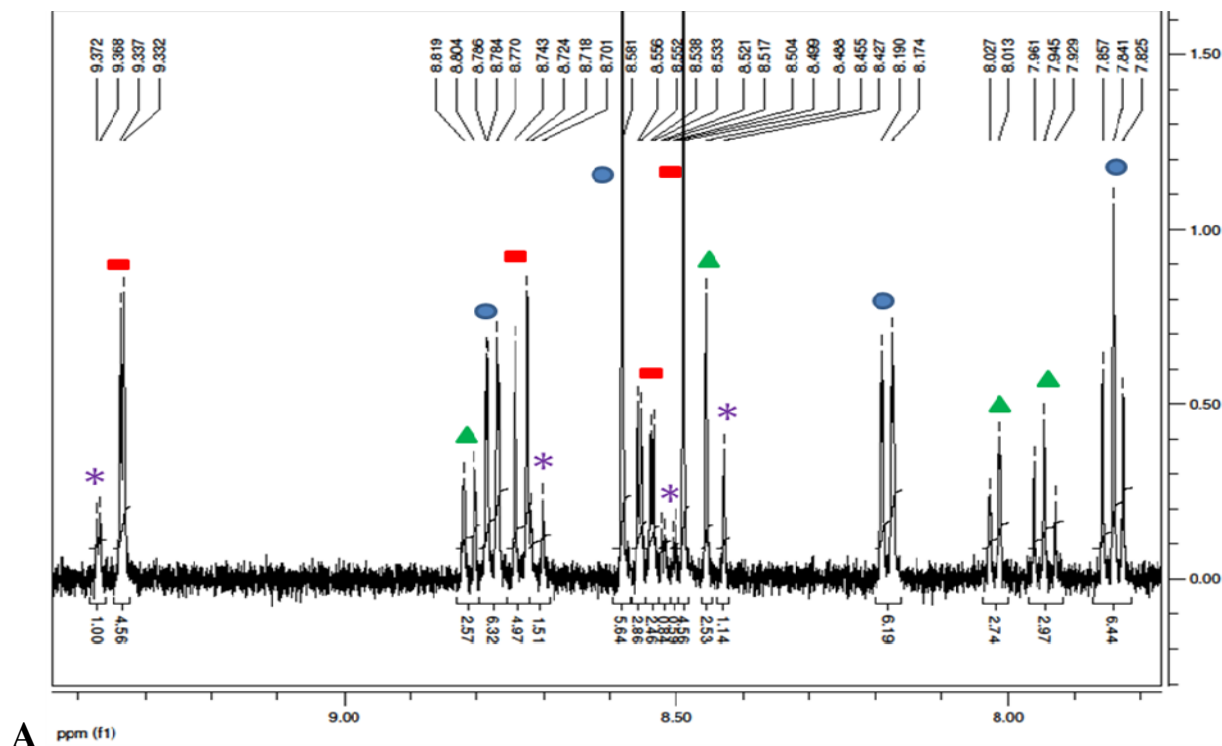

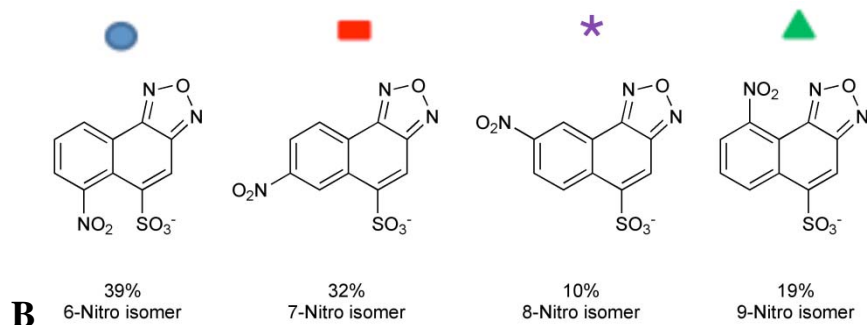

A. A  $^1\text{H}$  NMR spectrum of NSC339614 shows that it is a mixture of four nitro-substituted positional isomers: 6-nitro isomer (peaks with blue circles), 7-nitro isomer (peaks with red squares), 8-nitro isomer (peaks with purple asterisks) and 9-nitro isomer (peaks with green triangles). B. The ratio of the peaks at 8.43, 8.46, 8.49 and 8.58 ppm suggests a 39:32:10:19 ratio for the 6-nitro, 7-nitro, 8-nitro and 9-nitro isomers, respectively. It is not known which isomer(s) is the pharmacologically active form; NSC339614 is defined as the 7-nitro isomer.

**Figure 3** UBP512 does not potentiate NMDA receptor responses by chelating  $\text{Zn}^{++}$

$\text{Zn}^{++}$  is a high affinity negative modulator of GluN1/GluN2A receptors that binds to the N-terminal regulatory domain (NTD) of GluN2A(1, 2). The selective potentiation of GluN2A-containing receptors by UBP512 could potentially be due to the reversal of  $\text{Zn}^{++}$ -inhibition by  $\text{Zn}^{++}$  chelation. However, UBP512 potentiation was not affected by  $\text{Zn}^{++}$  chelation, nor by the addition of 100 nM  $\text{Zn}^{++}$  (Supplementary Fig. 1). Conversely, UBP512 addition did not alter the  $\text{EC}_{50}$ s for either the high affinity or the low affinity components of buffered(1)  $\text{Zn}^{++}$  inhibition at GluN1/GluN2A receptors.

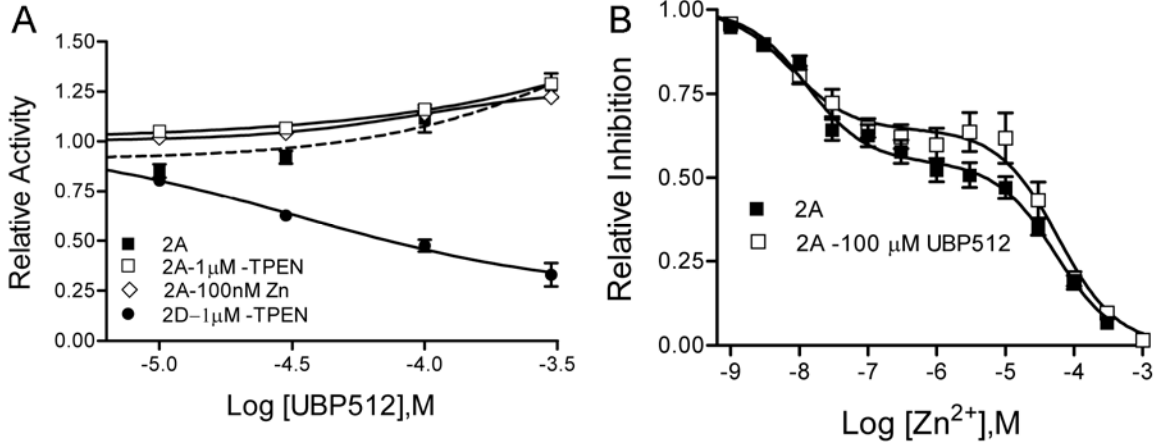

(A) UBP512 activity was determined at GluN1/GluN2A (2A) receptors in the presence or absence (dotted line) of the zinc chelator TPEN (N,N,N',N'-tetrakis-(2-pyridylmethyl)ethylenediamine) or ZnCl<sub>2</sub>. TPEN did not alter UBP512 activity at GluN1/GluN2D (2D) receptors. (B) ZnCl<sub>2</sub> inhibition of GluN1/GluN2A (2A) responses was unaltered by the addition of UBP512.

**Table 1.** X-axis and Y-axis scales for Figure 1.

|        |     | GluN1/GluN2A | GluN1/GluN2D |
|--------|-----|--------------|--------------|
| UBP512 | nA  | 110          | 380          |
|        | sec | 9            | 26           |
| UBP551 | nA  | 80           | 280          |
|        | sec | 18           | 13           |
| UBP608 | nA  | 220          | 120          |
|        | sec | 4            | 12           |
| UBP618 | nA  | 420          | 420          |
|        | sec | 7            | 10           |
| UBP710 | nA  | 170          | 750          |
|        | sec | 10           | 15           |
| UBP646 | nA  | 520          | 137          |
|        | sec | 23           | 60           |

**Table 2.** Compounds do not display agonist or partial agonist activity nor alter the holding current.

Compounds were tested for excitatory activity in the presence or absence of L-glutamate or glycine.

Values represent % activation  $\pm$  s.e.m., n = 4. G + E = 10  $\mu$ M glycine + 10  $\mu$ M L-glutamate, TC = test compound (100  $\mu$ M), G = 10  $\mu$ M glycine, E = 10  $\mu$ M L-glutamate.

|                          |                   | <b>UBP512</b>  | <b>UBP710</b>     | <b>UBP618</b>  | <b>UBP551</b>  | <b>NSC<br/>339614</b> | <b>UBP608</b>  | <b>UBP646</b> |
|--------------------------|-------------------|----------------|-------------------|----------------|----------------|-----------------------|----------------|---------------|
| <b>GluN1/<br/>GluN2A</b> | <b>G + E</b>      | 100.0          | 100.0             | 100.0          | 100.0          | 100.0                 | 100.0          | 100.0         |
|                          | <b>TC</b>         | -2.2 $\pm$ 1.2 | 2.7 $\pm$ 3.3     | 0.3 $\pm$ 2.4  | -1.0 $\pm$ 2.9 | -0.02 $\pm$ 0.3       | 0.2 $\pm$ 0.2  | 1.0 $\pm$ 0.1 |
|                          | <b>TC +<br/>G</b> | 4.1 $\pm$ 2.1  | 7.6 $\pm$ 4.8     | 3.5 $\pm$ 4.2  | 7.2 $\pm$ 3.3  | 0.3 $\pm$ 0.1         | 0.1 $\pm$ 0.2  | 0.7 $\pm$ 0.3 |
|                          | <b>TC +<br/>E</b> | 1.8 $\pm$ 1.2  | 0.03 $\pm$<br>1.2 | 5.0 $\pm$ 2.7  | -1.0 $\pm$ 4.1 | 0.4 $\pm$ 0.9         | 3.2 $\pm$ 3.1  | 1.8 $\pm$ 0.6 |
| <b>GluN1/<br/>GluN2D</b> | <b>G + E</b>      | 100.0          | 100.0             | 100.0          | 100.0          | 100.0                 | 100.0          | 100.0         |
|                          | <b>TC</b>         | -1.4 $\pm$ 1.9 | 0.6 $\pm$ 1.6     | -0.3 $\pm$ 0.2 | 0.1 $\pm$ 0.5  | 0.1 $\pm$ 0.8         | 1.4 $\pm$ 2.3  | 0.6 $\pm$ 0.2 |
|                          | <b>TC +<br/>G</b> | 3.7 $\pm$ 0.7  | 3.2 $\pm$ 2.1     | 3.0 $\pm$ 3.0  | 0.4 $\pm$ 1.3  | 2.1 $\pm$ 0.8         | 3.3 $\pm$ 1.7  | 0.9 $\pm$ 0.3 |
|                          | <b>TC +<br/>E</b> | 1.2 $\pm$ 0.5  | -0.7 $\pm$ 0.7    | 0.7 $\pm$ 0.4  | 1.6 $\pm$ 0.5  | 1.8 $\pm$ 0.3         | -1.2 $\pm$ 0.7 | 0.9 $\pm$ 0.3 |

1. Paoletti P, Ascher P, & Neyton J (1997) High-affinity zinc inhibition of NMDA NR1-NR2A receptors *J Neurosci* 17(15):5711-5725.
2. Paoletti P, *et al.* (2000) Molecular organization of a zinc binding n-terminal modulatory domain in a NMDA receptor subunit. *Neuron* 28(3):911-925.
